# Supplementary material for: Ionic polymer absorbents inspired by deep eutectic solvents to recover cobalt and nickel
Source: Royal Society of Chemistry journal article supplement (doi:10.1039/d4nj02316a), 2024-01-01
Supplement: d4nj02316a2.pdf [file d4nj02316a2.pdf]

## **Ionic polymer absorbents inspired by deep eutectic solvents to recover cobalt and nickel**

Henrique Bastos<sup>[a]</sup>, Antonela Gallastegui<sup>[b]</sup>, Jon López de Lacalle<sup>[b]</sup>, Nicolas Schaeffer<sup>[c]</sup>, Jennifer M. Pringle<sup>[a]</sup>, David Mecerreyes<sup>[b, f]\*</sup>, and Cristina Pozo-Gonzalo<sup>[a, d, e]\*</sup>

[a] Institute for Frontier Materials, Deakin University, 221 Burwood Highway, Burwood, Victoria 3125, Australia

[b] POLYMAT, University of the Basque Country UPV/EHU, Avenida Tolosa 72, 20018 Donostia-San Sebastián, Spain

[c] CICECO – Aveiro Institute of Materials, Department of Chemistry, University of Aveiro, 3810-1933 - Aveiro, Portugal

[d] Fundación Agencia Aragonesa para la Investigación y el Desarrollo (ARAID), Av. de Ranillas 1-D, 50018 Zaragoza, Spain.

[e] Instituto de Carboquímica (ICB-CSIC), C/Miguel Luesma Castán, 4, 50018, Zaragoza, Spain.

[f] Ikerbasque, Basque Foundation for Science, Bilbao

\* Corresponding authors e-mail: david.mecerreyes@ehu.es; cpozo@csic.es

**Table S1.** Polymer compositions used in this work, describing the HBA and HBD used as well as the HBA:HBD molar ratio of each component.

| Polymer name   | HBA   | HBD  | HBA:HBD molar ratio |
|----------------|-------|------|---------------------|
| polyMETAC:Gly  | METAC | Gly  | 1:2                 |
| polyMETAC:EG   |       | EG   | 1:2                 |
| polyMETAC:BdOH |       | BdOH | 1:2                 |
| polyMETAC:BuOH |       | BuOH | 1:2                 |
| polyMETAC:PCA  |       | PCA  | 2:1                 |
| polyMETAC:PGA  |       | PGA  | 1:1                 |
| polyMETAC:TA   |       | TA   | 20:1                |

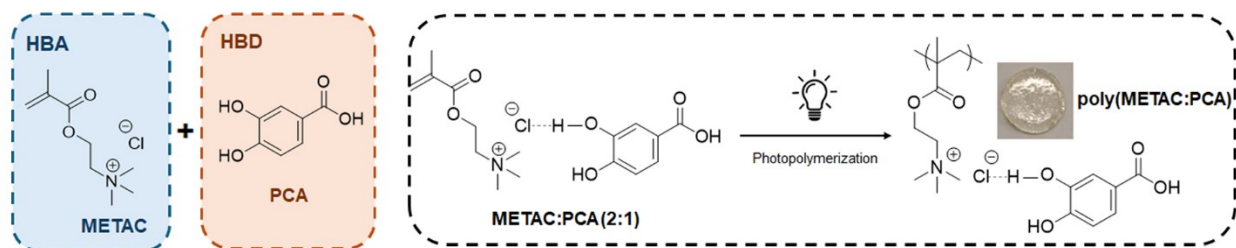

**Figure S1.** Schematic representation of the interaction between the HBA (METAC) and HBD of the monomer through hydrogen bonding of chloride of METAC and the OH-moiety of HBD, resulting in an ionic polymer after photopolymerization. In this case PCA is used as an example of HBD, although the same logic applied to the other polymers used in this work.

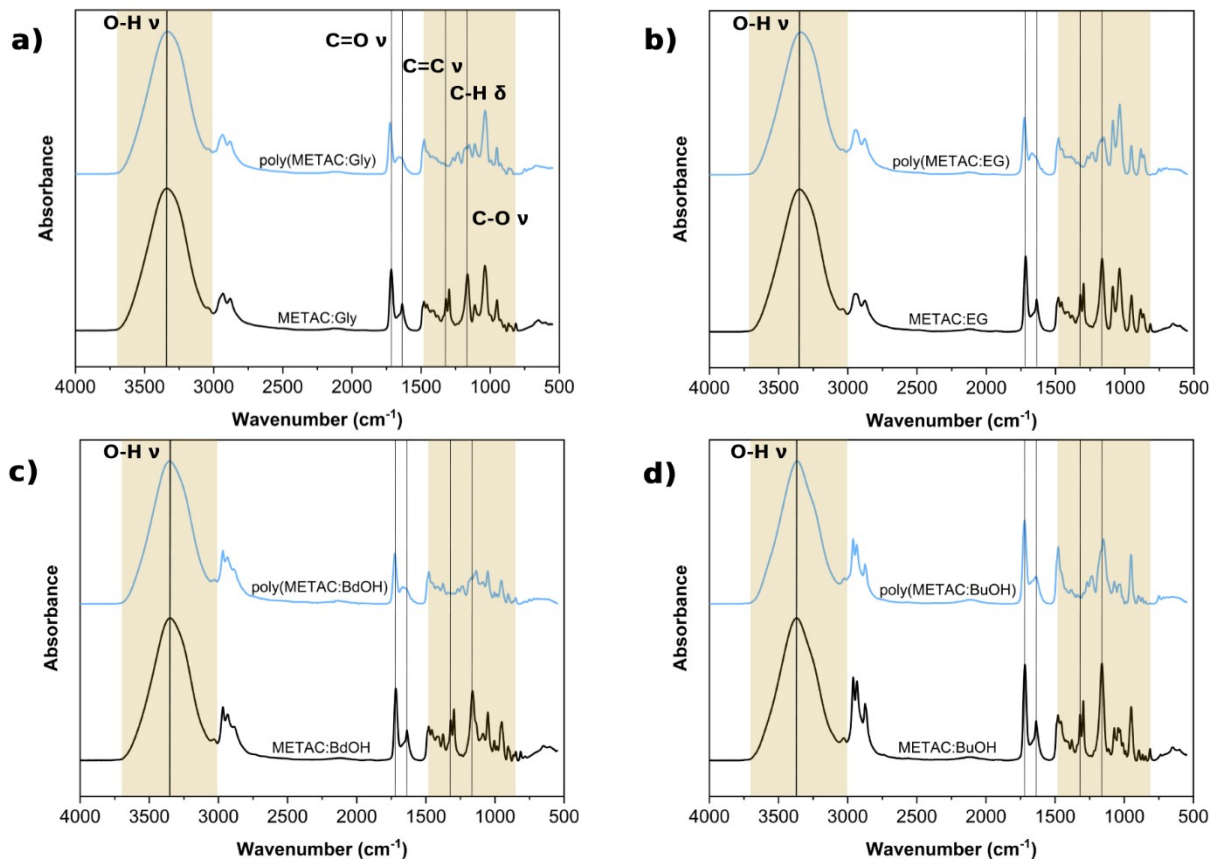

**Figure S2.** FTIR spectra of the monomers (bottom spectra), i.e. mixtures of METAC and hydroxylated solvents in a 1:2 molar ratio, and after their photopolymerization (poly, top spectra), with highlighted bands related to the polymerization process. The represented polymers are polyMETAC:Gly (a), polyMETAC:EG (b), polyMETAC:BdOH (c) and polyMETAC:BuOH (d).

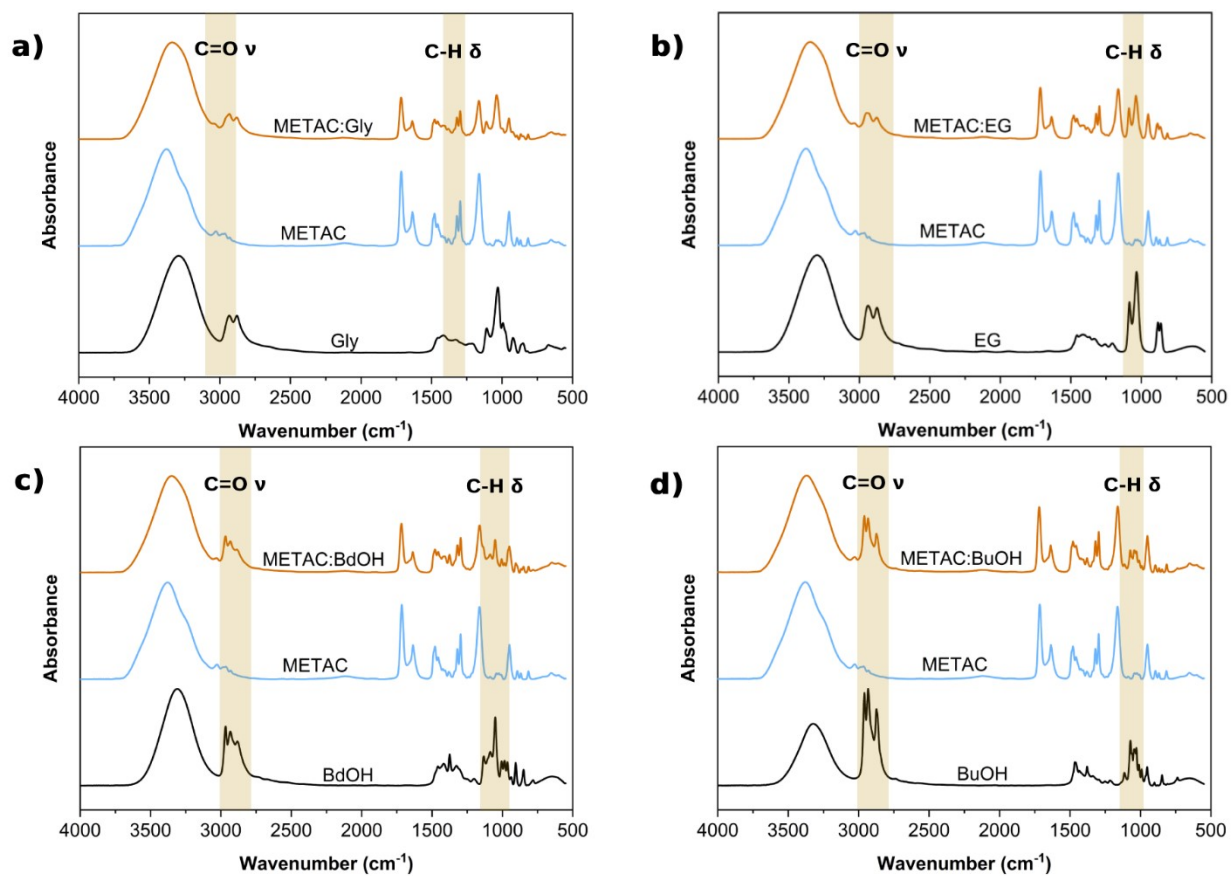

**Figure S3.** FTIR spectra of each monomer component, i.e. METAC or an hydroxylated solvent, and after mixing both components in a 1:2 molar ratio (METAC:hydroxylated solvent).

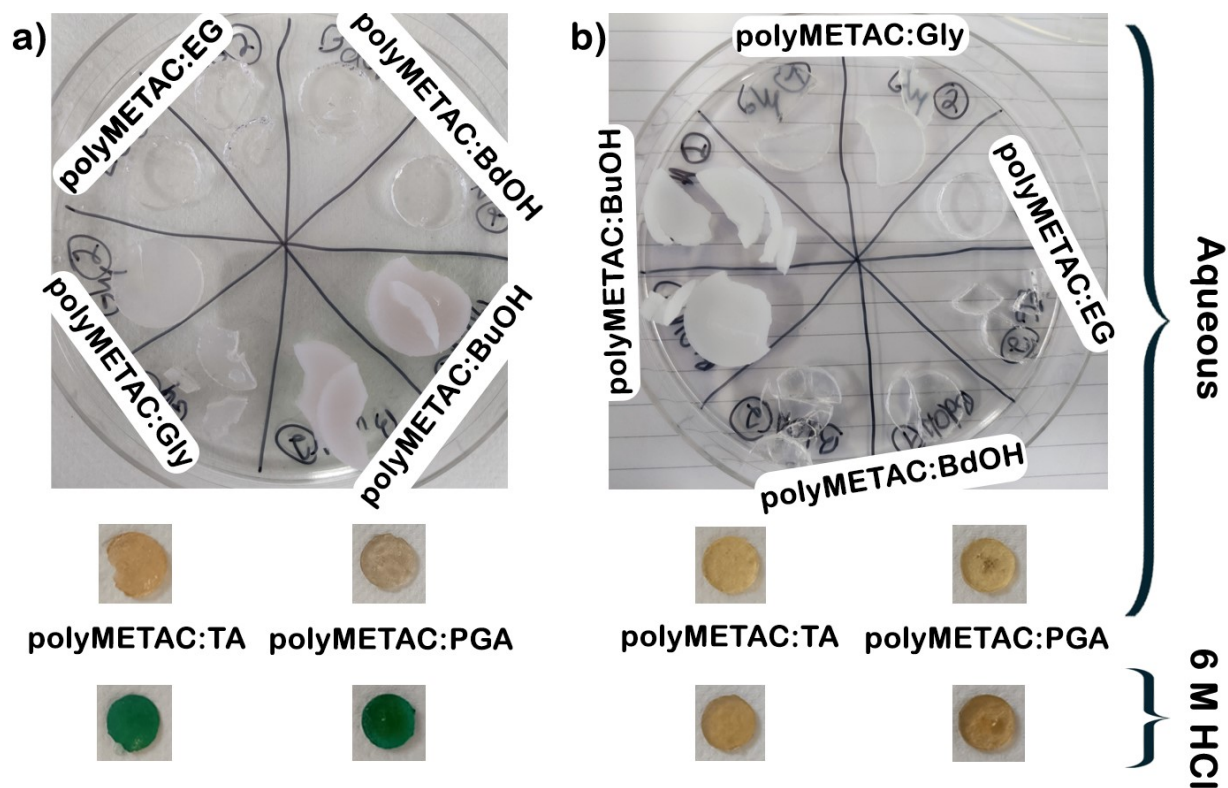

**Figure S4.** polyMETAC:Gly, polyMETAC:EG, polyMETAC:BdOH, polyMETAC:BuOH, polyMETAC:TA and polyMETAC:PGA polymers after preliminary metal absorption assays – 48 h contact with either 50 mM  $\text{CoCl}_2 \cdot 6\text{H}_2\text{O}$  (a) or 50 mM  $\text{NiCl}_2 \cdot 6\text{H}_2\text{O}$  (b) in aqueous solution (top) or 6 M HCl (bottom).

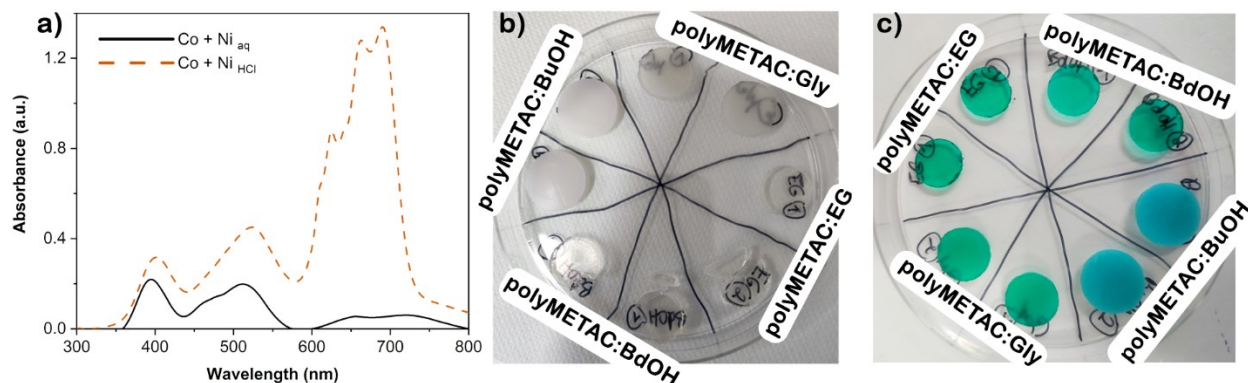

**Figure S5. a)** UV-Vis spectra of mixed  $\text{CoCl}_2 \cdot 6\text{H}_2\text{O}$  and  $\text{NiCl}_2 \cdot 6\text{H}_2\text{O}$  dissolved in either aqueous solution (aq) or in 6 M HCl (HCl), showing both Co and Ni species showed in the individual metal solutions. **b,c)** polyMETAC:Gly, polyMETAC:EG, polyMETAC:BdOH and polyMETAC:BuOH polymers after preliminary metal absorption assays – 48 h contact with 50 mM  $\text{CoCl}_2 \cdot 6\text{H}_2\text{O}$  and 50 mM  $\text{NiCl}_2 \cdot 6\text{H}_2\text{O}$  in either aqueous (b) or in 6 M HCl (c) solution.

**Table S2.** Fraction of carbon, hydrogen and nitrogen from CHN elemental analysis of selected polymers following metal uptake process in mixed Co-Ni solutions in 6 M HCl. The absorption capacity  $q_e$  was used to determine the nitrogen/absorbed metal ratios for discussion of the effect of the trimethylammonium moiety of METAC in the overall absorption capacity of the polymers.

| Sample        | % C          | % H         | % N         | Absorbed Co/Nitrogen | Absorbed Ni/Nitrogen |
|---------------|--------------|-------------|-------------|----------------------|----------------------|
| polyMETAC:Gly | 40.11 ± 0.11 | 7.36 ± 0.36 | 4.45 ± 0.02 | 0.55                 | 0.52                 |
| polyMETAC:EG  | 39.96 ± 0.32 | 7.37 ± 0.02 | 4.61 ± 0.08 | 0.53                 | 0.49                 |
| polyMETAC:PGA | 39.78 ± 0.15 | 7.34 ± 0.04 | 4.55 ± 0.04 | 0.35                 | 0.31                 |
| polyMETAC:TA  | 43.72 ± 0.03 | 7.08 ± 0.17 | 4.07 ± 0.08 | 0.57                 | 0.53                 |

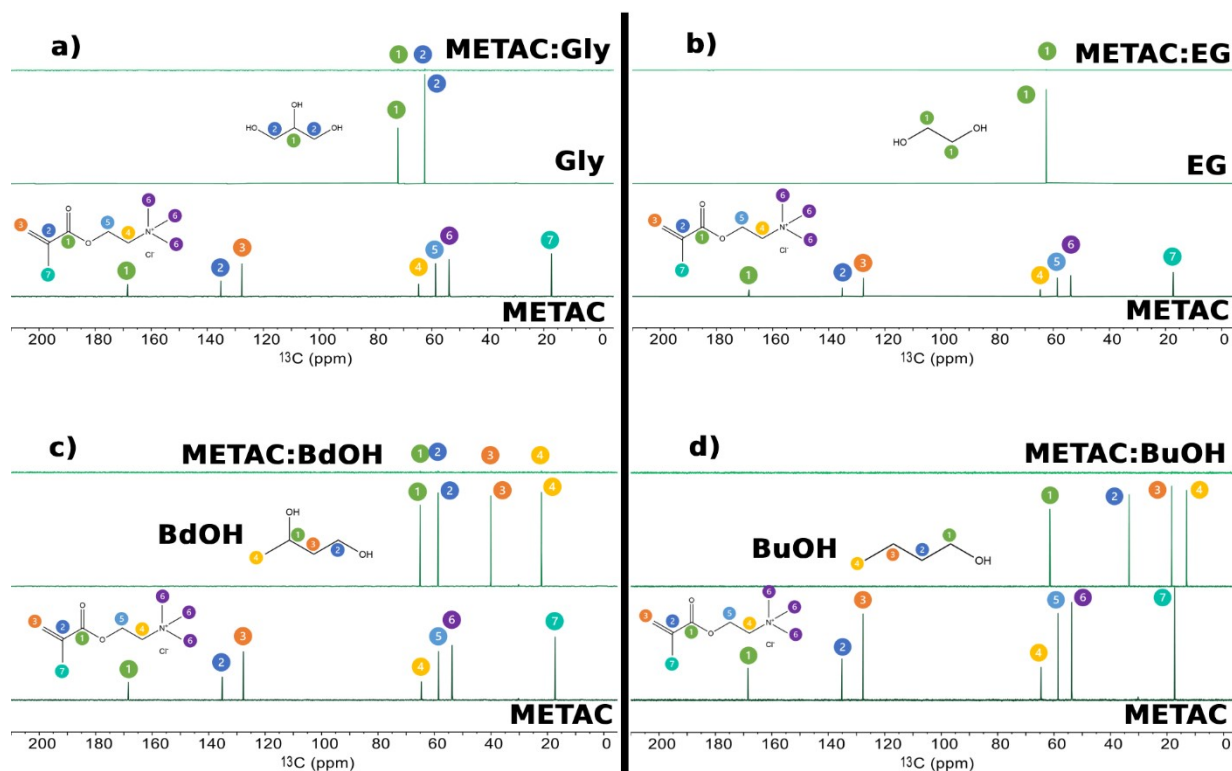

**Figure S6.**  $^{13}\text{C}$ -NMR spectra of remaining media after 48 h contact time of the polymers polyMETAC:Gly (a), polyMETAC:EG (b), polyMETAC:BdOH (c) and polyMETAC:BuOH (d) with 6 M HCl media. All samples were diluted in  $\text{D}_2\text{O}$  in the same ratios prior to analysis.

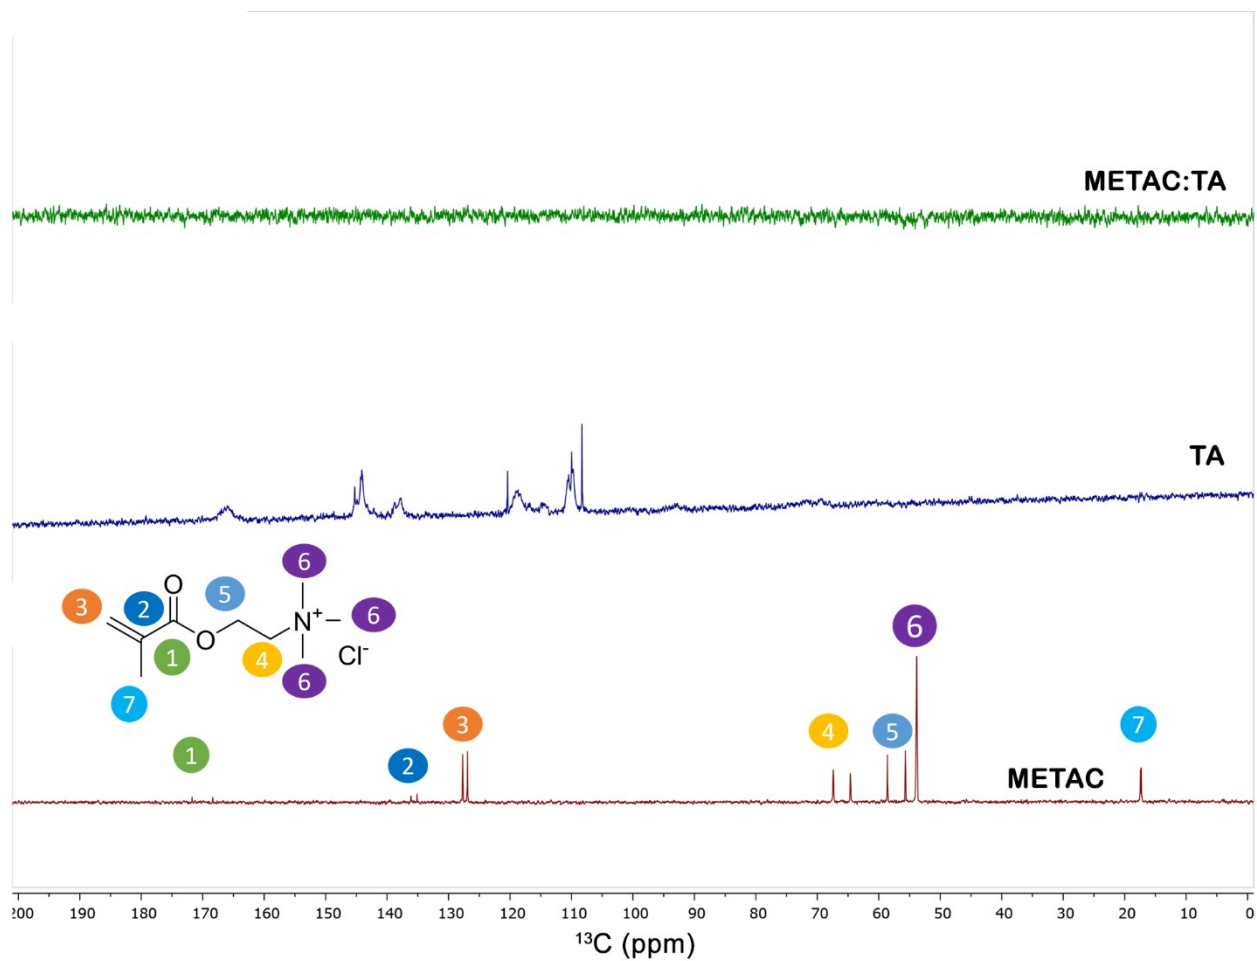

**Figure S7.**  $^{13}\text{C}$ -NMR spectra of remaining media after 48 h contact time of polyMETAC:TA with 6 M HCl media. The samples were diluted in  $\text{D}_2\text{O}$  in the same ratios prior to analysis.

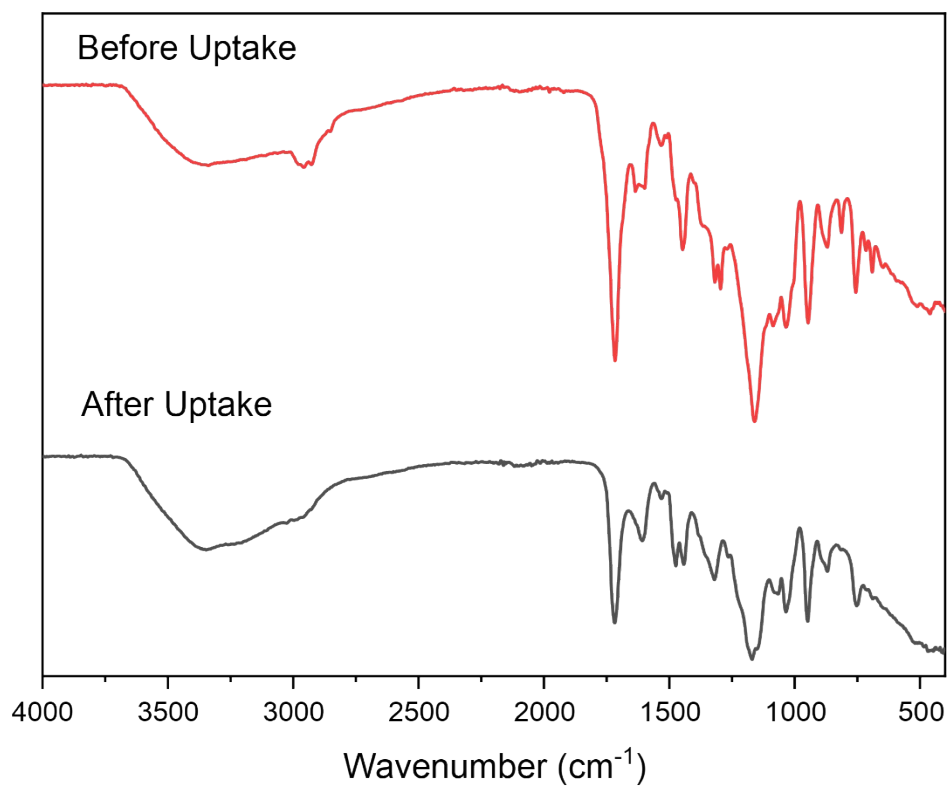

**Figure S8.** FTIR spectra of polyMETAC:TA before (top) and after (bottom) metal uptake, suggesting the maintenance of the polymeric structure.



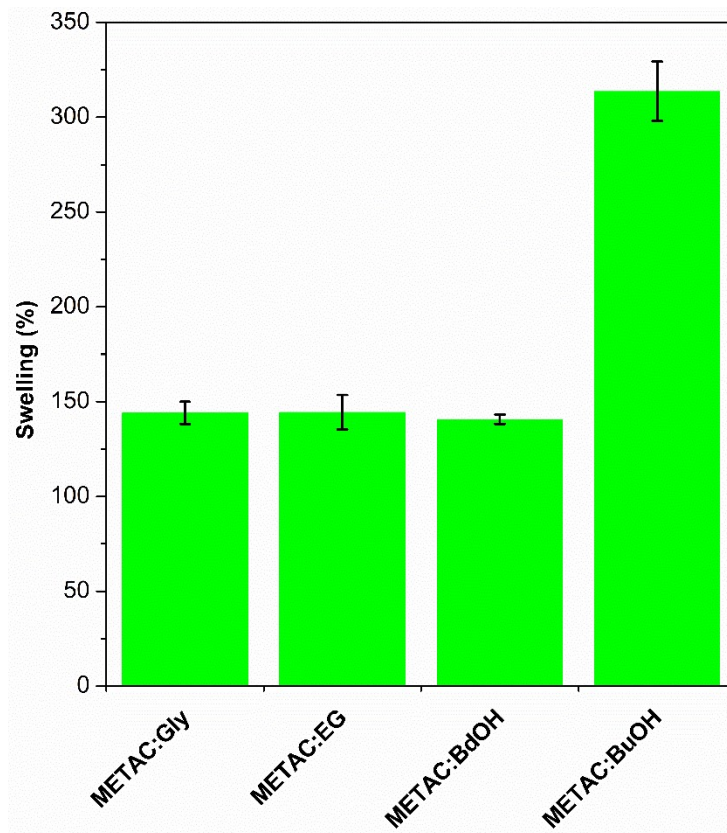

**Figure S9.** Swelling (%) of METAC:alcohol polymers after contact for 48 h with a mixture of Co and Ni, using 50 mM of each metal in 6 M HCl solutions and after a pre-equilibration step using 6 M HCl.

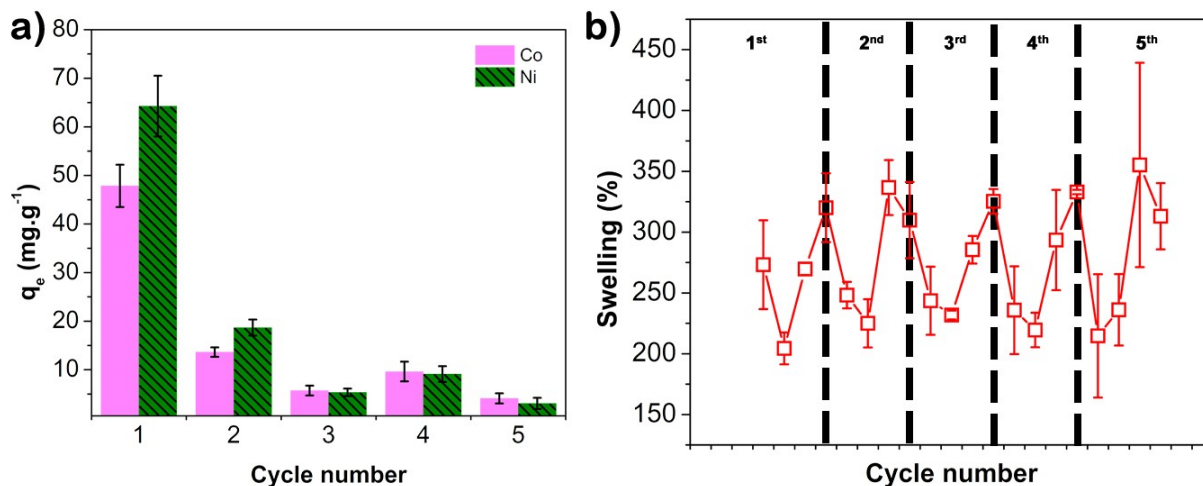

**Figure S10.** a) Absorption capacity of polyMETAC:EG in each of the five cycles after contacting a 50 mM  $\text{CoCl}_2\cdot 6\text{H}_2\text{O}$  and  $\text{NiCl}_2\cdot 6\text{H}_2\text{O}$  solution in 6 M HCl. b) Progression of the swelling degree of the METAC:EG polymers in each cycle, either after absorption of the metals or after each of the three water washes carried out in each cycle.

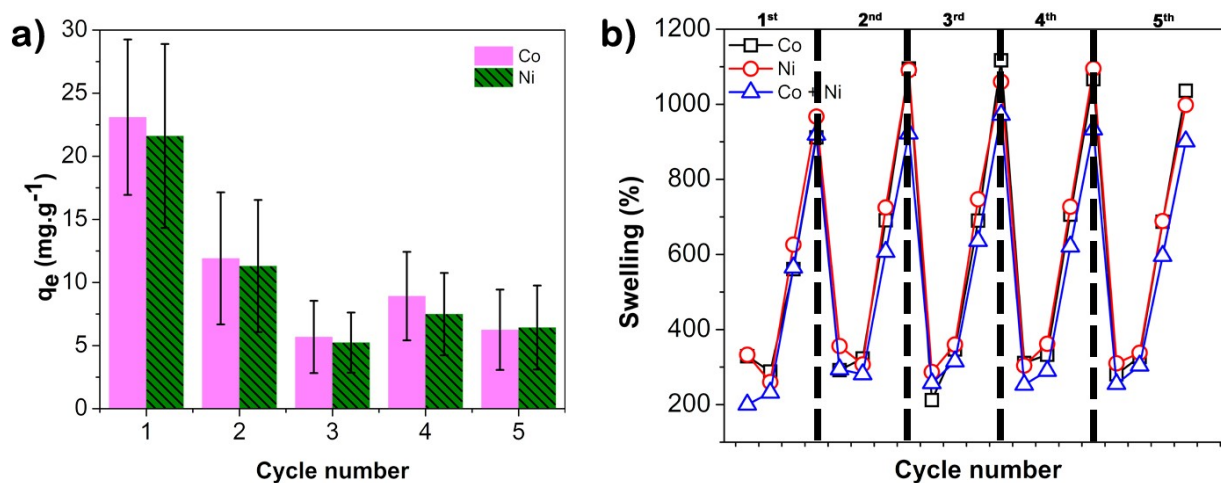

**Figure S11.** a) Absorption capacity of polyMETAC:TA in each of the five cycles after contacting a 50 mM  $\text{CoCl}_2\cdot 6\text{H}_2\text{O}$  and  $\text{NiCl}_2\cdot 6\text{H}_2\text{O}$  solution in 6 M HCl. b) Progression of the swelling degree of the METAC:TA polymers in each cycle, either after absorption of the metals or after each of the three water washes carried out in each cycle. Three different scenarios are shown, depending on the metal solution that was used during absorption, either individual 50 mM  $\text{CoCl}_2\cdot 6\text{H}_2\text{O}$  (Co,

black square), individual 50 mM  $\text{NiCl}_2 \cdot 6\text{H}_2\text{O}$  (Ni, red circle) or a mixture of both (Co + Ni, blue triangle).
